# Supplementary material for: Persistence of Campylobacter spp. in Poultry Flocks after Disinfection, Virulence, and Antimicrobial Resistance Traits of Recovered Isolates
Source: MDPI journal article supplement (doi:10.3390/antibiotics12050890), 2023-05-10
Supplement: s1 [file s1]

## ***Supplementary File S1***

### ***Date of visit***

#### **1. General information**

##### **Date of visit**

#### **2. Specific information**

Poultry: breeding hens

Type of rearing: Cage

-Are there any other poultry productions other than those designated on the farm: No

-Are there any other animal productions other than poultry production: No

-Does the farmer have a backyard: No

#### **3. Center infrastructure**

Closure: Hard

Front door: Yes

Guard at the door: Yes

Rotoluve: Yes

Device for cleaning and disinfection of vehicles at the entrance of the establishment: Yes

Presence of visitor cloakroom: Yes

#### **4. Building infrastructure**

-Presence of airlock: Yes

-Presence of shower: Yes

-Presence of visitor cloakroom: Yes

-Presence of footbaths at the doors: Yes

-Cooling system: Yes

-Presence of sink: Yes

-Ventilation system: static dynamic: Yes

-Grille at the windows: Yes

-Skylight mesh: Yes

-Is there an exchange of equipment from one building to another: No

#### **5. Personnel management**

- Staff wear work clothes: Yes

- Work clothes are clean and correct: Yes
- Clothing for visitors: Yes
- Personnel benefits from a medical visit: Yes

|                                                                                |                        |                                   |
|--------------------------------------------------------------------------------|------------------------|-----------------------------------|
| <b>Laboratoire<br/>d'épidémiologie et de<br/>Microbiologie<br/>Vétérinaire</b> | <b>Fiche d'enquête</b> | <b>Date d'édition : Mars 2013</b> |
|--------------------------------------------------------------------------------|------------------------|-----------------------------------|

### **Date de visite**

#### **1- Renseignements généraux**

- Nom du centre : .....

- Adresse du centre : .....

- Gouvernorat : ..... Délégation : .....

#### **2- Renseignements spécifiques**

- Volailles :            Ponte ☐            Chair ☐

- Mode d'élevage :    Sol   ☐            Cage ☐

- Ya-t-il d'autres productions avicoles autres que celles désigné sur l'exploitation :

Oui ☐            Non ☐

- y-a-t-il d'autres productions animales hors productions avicoles

Oui ☐            Non ☐

- L'éleveur possède t'il une basse cour :

Oui ☐            Non ☐

#### **3- Infrastructure du centre**

- Clôture : en dur ☐ grillage ☐ mixte ☐ arbres ☐ absente ☐

- Porte d'entrée : Oui ☐ Non ☐

- Gardien à la porte : Oui ☐ Non ☐

- Rotoluve : Oui ☐ Non ☐

- Fréquence d'entretien du rotoluve : .....

- Produit utilisé : .....

- Dispositif de nettoyage et de désinfection des véhicules à l'entrée de l'établissement

Oui ☐ Non ☐

- Présence de vestiaires visiteurs: Oui ☐ Non ☐

#### 4- Infrastructure des bâtiments

- Présence de sas : Oui ☐ Non ☐

- Présence de douche : Oui ☐ Non ☐

- Présence de vestiaires visiteurs : Oui ☐ Non ☐

- Présence de pédiluves aux portes : Oui ☐ Non ☐

- Système de refroidissement : Oui ☐ Non ☐

- Présence de lavabo : Oui ☐ Non ☐

- Système d'aération : dynamique statique: Oui ☐ Non ☐

- Si dynamique, système d'aération protégé: Oui ☐ Non ☐

- Grillage aux fenêtres : Oui ☐ Non ☐

- Grillage aux lanterneaux : Oui ☐ Non ☐

- Existe-il un échange de matériel d'un bâtiment à l'autre : Oui ☐ Non ☐

#### 5- Gestion du personnel

- Personnel porte une tenue de travail : Oui ☐ Non ☐

- Tenue de travail est propre et correcte : Oui ☐ Non ☐

Tenue pour les visiteurs : Oui ☐ Non ☐

Personnel bénéficie d'une visite médicale : Oui ☐ Non ☐

**Table S1.** PCR primers and conditions used in this study

| Species/antibiotics/<br>Virulence factors                          | Target<br>Gene              | Primer Sequence (5'-3')                                                                                                | T <sub>m</sub> (°C) | Product size<br>(bp) | Reference |
|--------------------------------------------------------------------|-----------------------------|------------------------------------------------------------------------------------------------------------------------|---------------------|----------------------|-----------|
| <i>Campylobacter</i> spp.                                          | 16S rRNA                    | F : GGATGACACTTTTCGGAGC<br>R : CATTGTAGCACGTGTGTC                                                                      | 55                  | 855                  | [53]      |
| <i>C. jejuni</i>                                                   | <i>mapA</i>                 | F : CTATTTTATTTTGAGTGCTTGTC<br>R : GCTTTATTGCCATTTGTTTATTA                                                             | 55                  | 589                  | [61]      |
| <i>C. coli</i>                                                     | <i>cdtA</i>                 | F : ATTGCCAAGGCTAAAATCTC<br>R : GATAAAGTCTCCAAAAGTGC                                                                   | 52                  | 370                  | [62]      |
| Tetracycline                                                       | <i>tet(O)</i>               | F: GCGTTTTGTTTATGTGCG<br>R: ATGGACAACCCGACAGAAG                                                                        | 54                  | 559                  | [63]      |
| Multidrug<br>CmeABC efflux<br>system                               | <i>cmeB</i>                 | F: AGGCGGTTTTGAAATGTATGTT<br>R: TGTGCCGCTGGGAAAAG                                                                      | 52                  | 444                  | [64]      |
| Ampicillin/Amoxici<br>llin                                         | <i>bla<sub>OXA-61</sub></i> | F: AGAGTATAATACAAGCG<br>R: TAGTGAGTTGTCAAGCC                                                                           | 52                  | 372                  | [65]      |
| Gentamicin                                                         | <i>aphA-3</i>               | F: TCGTAAAAGATACGGAAG<br>R: CAATCAGGCTTGATCCCC                                                                         | 52                  | 701                  | [65]      |
| Erythromycin                                                       | 23S rRNA                    | 23S rRNA:<br>TTAGCTAATGTTGCCGTACCG<br><br>ERY2075:<br>TAGTAAAGGTCCACGGGGTCGC<br><br>ERY2074:<br>AGTAAAGGTCCACGGGGTCTGG | 50                  | 485                  | [59]      |
| Ciprofloxacin /Nalidixic<br>acid                                   | <i>gyrA-Cj</i>              | gryA1: TTTTAGCAAAGATTCTGAT<br>gyrA5: AAAGCATCATAAACTGCAA<br>gyrA4: CAAAGCATCATAAACTGCAG                                | 52                  | 265<br>368           | [58]      |
|                                                                    | <i>gyrA-Cc</i>              | gyrA3: TATGAGCGTTATTATCGGTC<br>gyrA8: TAAGGCATCGTAAACAGCCA<br>gyrA4: GTCCATCTACAAGCTCGTTA                              | 55                  | 192<br>505           |           |
| FlaA protein (motility)                                            | <i>flaA</i>                 | F:AATAAAAAATGCTCATAAAAAACAGGTG<br>R:TACCGAACCAATGTCTGCTCTGATT                                                          | 55                  | 855                  | [66]      |
| CadF, outer membrane<br>protein (adhesion)                         | <i>cadF</i>                 | F : TTGAAGGTAATTTAGATATG<br>R : CTAATACCTAAAGTTGAAAC                                                                   | 54                  | 400                  | [69]      |
| Cytolethal distending<br>toxin subunit (CDT toxin<br>production)   | <i>cdtA</i>                 | F : CCTGTGATGCAAGCAATC<br>R : ACACTCCATTGCTTTCTG                                                                       | 52                  | 370                  | [68]      |
| Cytolethal distending<br>toxin subunit B (CDT<br>toxin production) | <i>cdtB</i>                 | F : CAGAAAGCAAATGGAGTGTT<br>R : AGCTAAAAGCGGTGGAGTAT                                                                   | 51                  | 620                  | [66]      |
| Cytolethal distending<br>toxin subunit C (CDT<br>toxin production) | <i>cdtC</i>                 | F : CGATGAGTTAAAAACAAAAGATA<br>R : TTGGCATTATAGAAAATACAGTT                                                             | 47                  | 182                  | [66]      |

|                                                                            |                                       |                                                                                                                      |              |                |      |
|----------------------------------------------------------------------------|---------------------------------------|----------------------------------------------------------------------------------------------------------------------|--------------|----------------|------|
| Type IV secretion system (invasion)                                        | <i>virB11</i>                         | F : TCTGTGAGTTGCCTTACCCCTTT<br>R : CCTGCGTGCCTGTGTTATTACCC                                                           | 48           | 494            | [66] |
| 1,3 galactosyltransferases involved in lipopolysaccharide production (GBS) | <i>wlaN</i><br><br><i>CgtB</i>        | F : TTAAGAGCAAGATATGAAGGTG<br>R : CCATTGAATTGATATTTTG<br><br>F :TAAGAGCAAGATATGAAGGTG<br>R :GCACATAGAGAACGCTACAA     | 46<br><br>49 | 672<br><br>561 | [53] |
| CeuE, lipoproteininvolved in iron acquisition                              | <i>ceuE- Cj</i><br><br><i>ceuE-Cc</i> | F :CCTGCTACGGTGAAAGTTTTGC<br>R :GATCTTTTGTGTTGTGCTGC<br><br>F :ATGAAAAAATA TTTAGTTTTTGCA<br>R :ATTTTATTATTG TAGCAGCG | 48<br><br>48 | 793<br><br>462 | [69] |
